# Supplementary material for: 1-Aminocyclopropane-1-carboxylic acid deaminase producing beneficial rhizobacteria ameliorate the biomass characters of Panicum maximum Jacq. by mitigating drought and salt stress
Source: PubMed Central journal article supplement (PMC6269535; doi:10.1038/s41598-018-35565-3), 2018-11-30
Supplement: 41598_2018_35565_MOESM1_ESM.pdf [file 41598_2018_35565_MOESM1_ESM.pdf]

## Supplementary information

to

**1-Aminocyclopropane-1-carboxylic acid deaminase producing beneficial rhizobacteria ameliorate the biomass characters of *Panicum maximum* Jacq. by mitigating drought and salt stress**

**Garima Tiwari<sup>1</sup>, Duraivadivel P<sup>2</sup>, Satyawati Sharma<sup>1</sup>, and Hariprasad. P.<sup>2,\*</sup>**

### **Affiliation**

<sup>1</sup>Biochemistry Lab, Centre for Rural Development and Technology, Indian Institute of Technology Delhi, Hauz Khas, New Delhi 110016.

<sup>2</sup>Environmental Biotechnology Lab, Centre for Rural Development and Technology, Indian Institute of Technology Delhi, Hauz Khas, New Delhi 110016.

**Table S1. ACC-utilizing bacteria tested in the present study**

| <b>S.No</b> | <b>Isolates</b> | <b>Closest matching species</b> | <b>Accession Number</b> |
|-------------|-----------------|---------------------------------|-------------------------|
| 1           | 5JB             | <i>Bacillus licheniformis</i>   | KY449413                |
| 2           | 20B             | <i>Bacillus licheniformis</i>   | KY468996                |
| 3           | 7C              | <i>Bacillus species</i>         | NS                      |
| 4           | 11-2E           | <i>Pseudomonas species</i>      | NS                      |
| 5           | 22F2            | <i>Bacillus licheniformis</i>   | KY468997                |
| 6           | 22F1            | <i>Bacillus licheniformis</i>   | KY468998                |
| 7           | 4F1             | <i>Bacillus licheniformis</i>   | KY468999                |
| 8           | 3B              | <i>Bacillus licheniformis</i>   | KY469000                |
| 9           | 11-2F           | <i>Uncultured citrobacter</i>   | NS                      |
| 10          | 20N             | <i>Bacillus licheniformis</i>   | KY469001                |
| 11          | 8F              | <i>Pseudomonas species</i>      | NS                      |
| 12          | 11G             | <i>Bacillus licheniformis</i>   | KY469002                |
| 13          | 2L              | <i>Uncultured citrobacter</i>   | NS                      |
| 14          | 14P             | <i>Alcaligenesfaecalis</i>      | KY469003                |
| 15          | 3E              | <i>Paenibacillus alvei</i>      | KY469004                |
| 16          | 4F11            | <i>Pseudomonas species</i>      | NS                      |
| 17          | 18D             | <i>Bacillus licheniformis</i>   | KY469005                |
| 18          | 14N             | <i>Bacillus licheniformis</i>   | KY469006                |
| 19          | 3C              | <i>Bacillus licheniformis</i>   | KY469007                |
| 20          | 5C              | <i>Bacillus licheniformis</i>   | KY469008                |
| 21          | 20F             | <i>Pseudomonas species</i>      | NS                      |
| 22          | 23*             | <i>Pseudomonas species</i>      | NS                      |
| 23          | 18G             | <i>Bacillus licheniformis</i>   | KY558747                |
| 24          | 4F2             | <i>Pseudomonas species</i>      | NS                      |
| 25          | 23G             | <i>Bacillus subtilis</i>        | KY469009                |
| 26          | 1JF             | <i>Bacillus licheniformis</i>   | KY469010                |
| 27          | 7JG             | <i>Bacillus subtilis</i>        | KY558778                |
| 28          | 7D              | <i>Bacillus licheniformis</i>   | KY469011                |
| 29          | 24F             | <i>Bacillus subtilis</i>        | KY560576                |
| 30          | 22A             | <i>Bacillus subtilis</i>        | NS                      |
| 31          | 5JE             | <i>Bacillus subtilis</i>        | KY561335                |
| 32          | 20H             | <i>Bacillus licheniformis</i>   | KY469012                |
| 33          | 14G             | <i>Bacillus subtilis</i>        | NS                      |
| 34          | 11-2I           | <i>Bacillus licheniformis</i>   | KY469013                |
| 35          | 18F             | <i>Bacillus subtilis</i>        | KY561346                |
| 36          | 5JD             | <i>Bacillus subtilis</i>        | KY561342                |
| 37          | 4A*             | <i>Bacillus licheniformis</i>   | KY469014                |

NS: Not submitted.

**Table S2. Physicochemical chemical characteristics of soil used for the experiments.**

| <b>Physicochemical characteristics</b> | <b>Values obtained</b>   |
|----------------------------------------|--------------------------|
| Texture                                | Sandy Loam               |
| EC                                     | 630 $\mu\text{S m}^{-1}$ |
| pH                                     | 7.46                     |
| Organic carbon                         | 1.73%                    |
| Total nitrogen                         | 0.51%                    |
| Available phosphorus                   | 11.3 mg/kg               |
| Potassium                              | 54.3 mg/kg               |

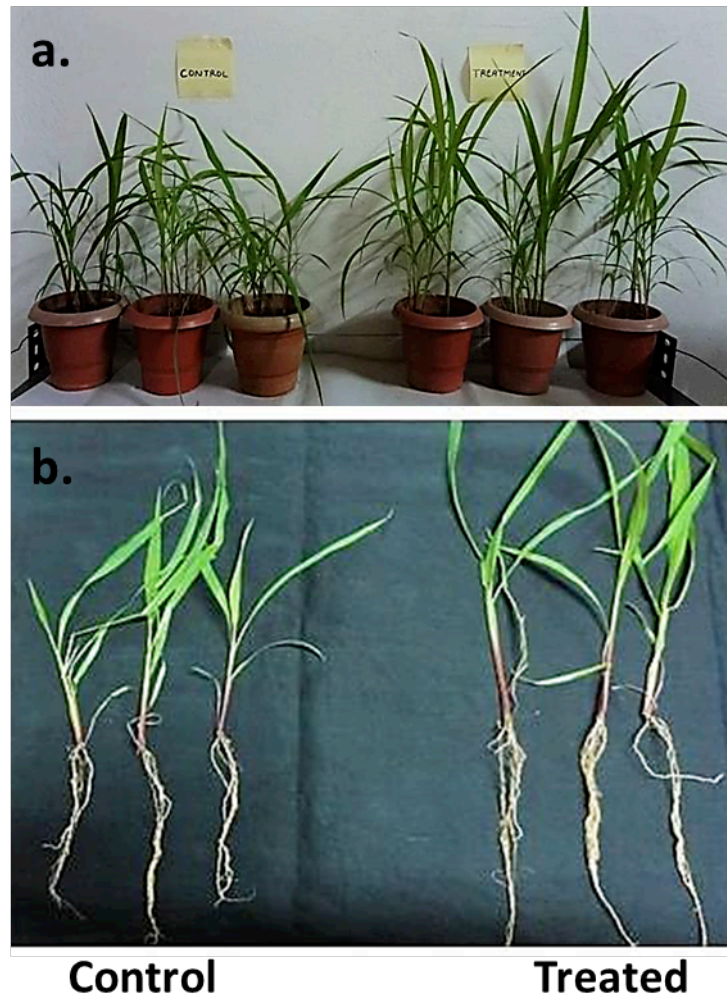

**Fig S1. Plant growth promotion studies under normal condition. (a) pot experiments and (b) root and shoot length analysis.**

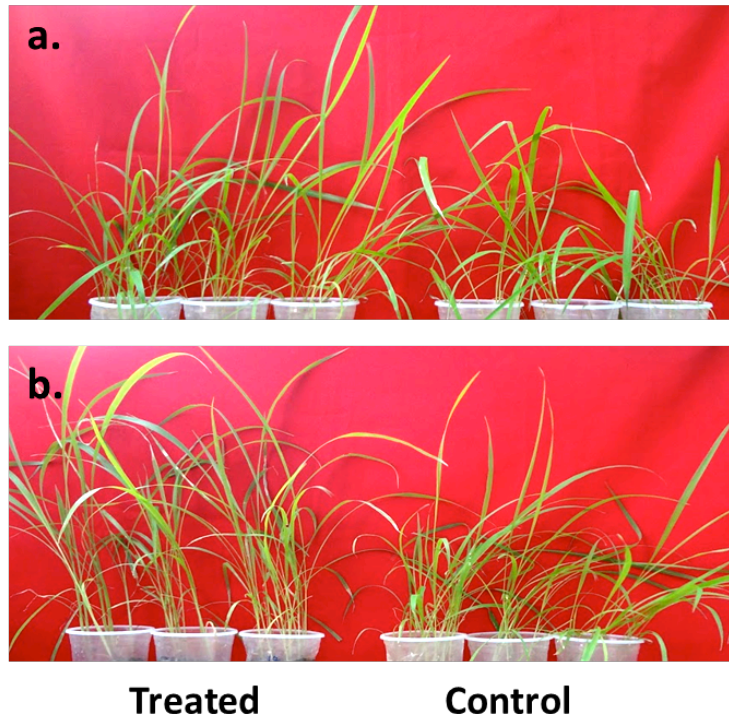

**Fig S2. Control and bacterial treated plants exposed to (a) Salt and (b) Drought stress.**
